# Supplementary material
Source: publisher figshare collection journal article supplement (https://acs.figshare.com/ndownloader/files/11494514)
Supplement: Supplementary file 1 [file 11494514]

## Supporting Information

### Effects of Se incorporation in $\text{La}_5\text{Ti}_2\text{CuS}_5\text{O}_7$ by annealing on physical properties and photocatalytic $\text{H}_2$ evolution activity

Swarnava Nandy<sup>a,#</sup>, Takashi Hisatomi<sup>a,⊥</sup>, Song Sun<sup>a,b</sup>, Masao Katayama<sup>a</sup>, Tsutomu Minegishi<sup>a</sup>, Kazunari Domen<sup>a,c,\*</sup>

<sup>a</sup> *Department of Chemical System Engineering, The University of Tokyo, 7-3-1 Hongo, Bunkyo-ku, Tokyo 113-8656, Japan*

<sup>b</sup> *National Synchrotron Radiation Laboratory, Collaborative Innovation Centre of Chemistry for Energy Materials, University of Science & Technology of China, Hefei, Anhui 230029, China*

<sup>c</sup> *Center for Energy & Environmental Science, Shinshu University, 4-17-1 Wakasato, Nagano-shi, Nagano 380-8553, Japan*

<sup>#</sup> *Current affiliation: Laboratory of Renewable Energy Science and Engineering, Institute of Mechanical Engineering, Swiss Federal Institute of Technology in Lausanne (EPFL), Station 9, Lausanne 1015, Switzerland*

<sup>⊥</sup> *Current affiliation: Center for Energy & Environmental Science, Shinshu University, 4-17-1 Wakasato, Nagano-shi, Nagano 380-8553, Japan*

*\*Corresponding author: [domen@chemsys.t.u-tokyo.ac.jp](mailto:domen@chemsys.t.u-tokyo.ac.jp)*

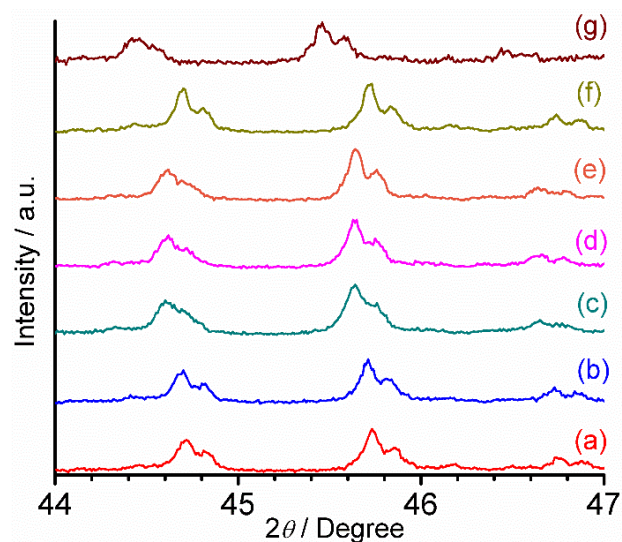

**Figure S1.** Magnified XRD patterns for (a) pristine LTCsO, LTCsO samples heated with Se at (b) 873, (c) 973 and (d) 1073 and (e) 1273 K, (f) LTCsO heated without Se at 973 K, and (g)  $\text{LTCS}_{0.8}\text{Se}_{0.2}\text{O}$  solid solution (presented for comparison purposes).

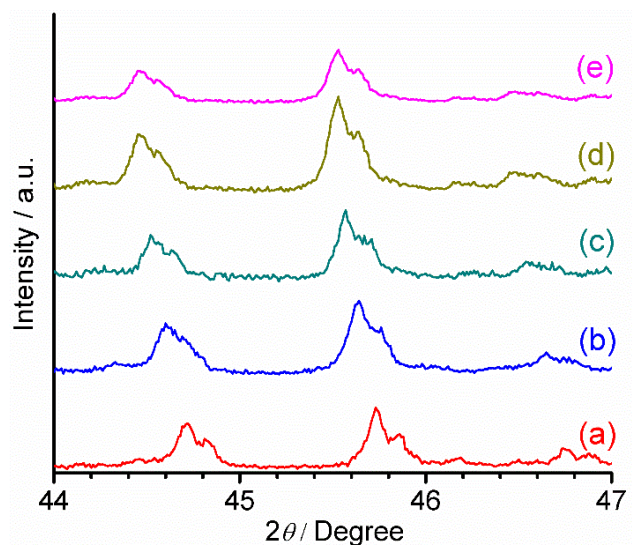

**Figure S2.** Magnified XRD patterns of (a) pristine LTCSO, LTCSO heated with Se at 973 K (b) once, (c) twice and (d) thrice, and (e)  $\text{LTCS}_{0.8}\text{Se}_{0.2}\text{O}$  solid solution (presented for comparison purposes).

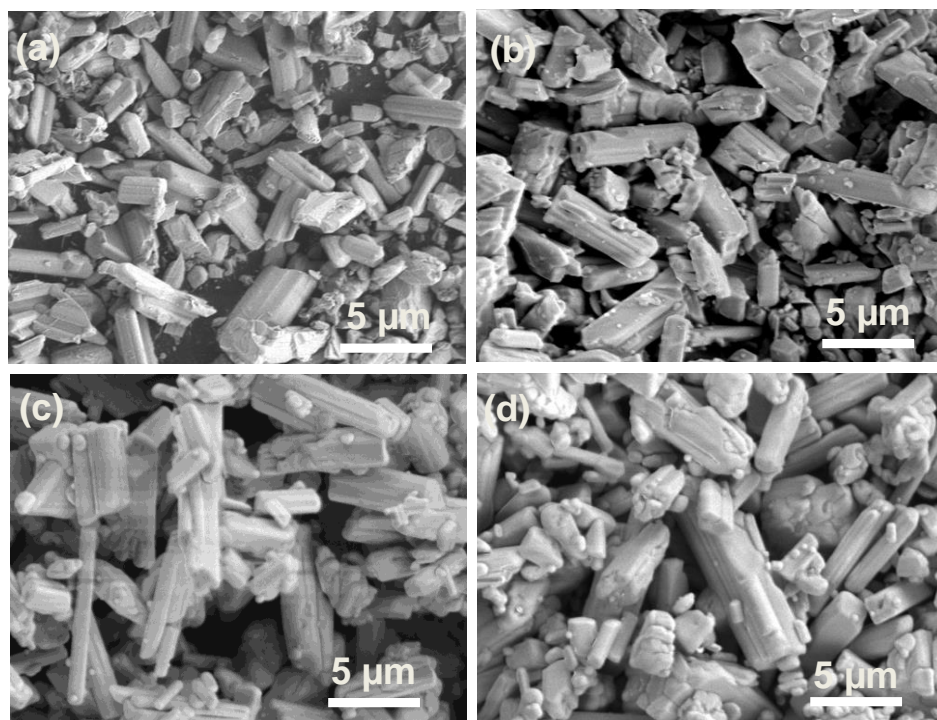

**Figure S3.** SEM images of (a) LTCrSO and (b-d) LTCrSO:Se samples heated with Se at 973 K (b) once, (c) twice, (d) and thrice, respectively.

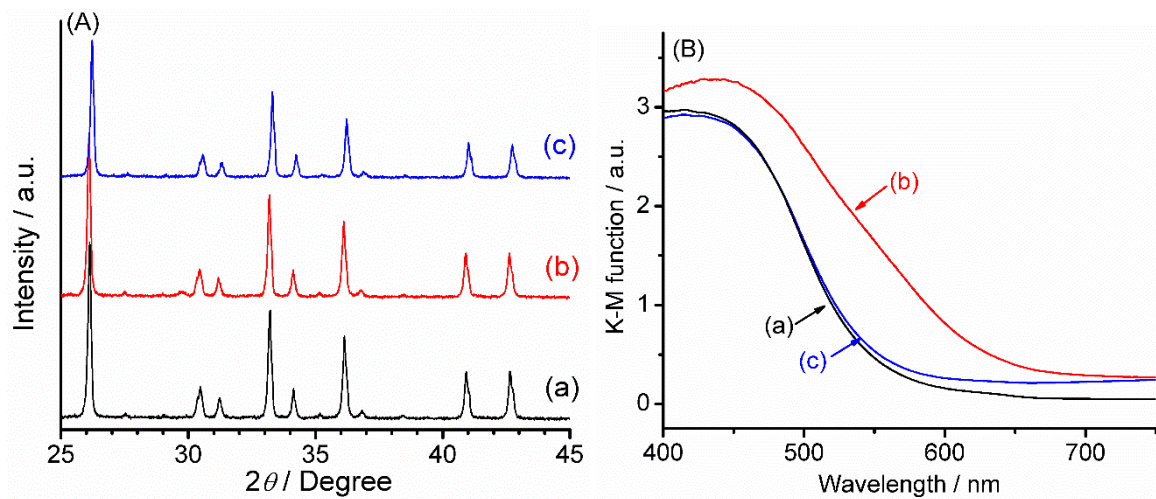

**Figure S4.** (A) XRD patterns and (B) DR spectra for (a) pristine  $\text{Sm}_2\text{Ti}_2\text{S}_2\text{O}_5$  (STSO) and STSO heated with (b) Se and (c) S at 873 K.

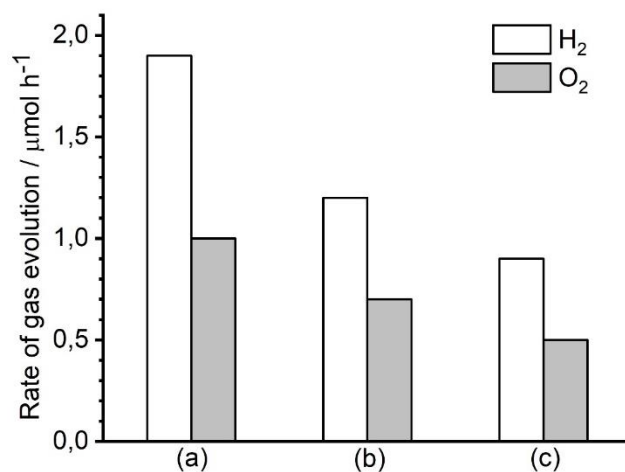

**Figure S5.** Water-splitting activity of LTCsO:Se/Au/BVO photocatalyst sheets loaded with Cr<sub>2</sub>O<sub>3</sub> and (a) Ru, (b) Rh and (c) Pt cocatalysts. The LTCsO:Se sample was treated with Se at 973 K once. Reaction conditions: distilled water (40 mL); light source: 300 W Xe lamp equipped with a cut-off filter ( $\lambda > 420$  nm); irradiation area: 8 cm<sup>2</sup>.
